1 **Effects of vitamin D on inflammatory and oxidative stress**  
2 **responses of human bronchial epithelial cells exposed to**  
3 **particulate matter**

4  
5 **Running Title:** Vitamin D alters responses to urban particulate matter

6  
7 Paul E Pfeffer <sup>1,2</sup>

8 Haw Lu <sup>1</sup>

9 Elizabeth H Mann <sup>1</sup>

10 Yin-Huai Chen <sup>1</sup>

11 Tzer-Ren Ho <sup>1</sup>

12 David J Cousins <sup>1,3</sup>

13 Chris Corrigan <sup>1</sup>

14 Frank J Kelly <sup>4</sup>

15 Ian S Mudway <sup>4</sup>

16 Catherine M Hawrylowicz <sup>1</sup>

17

18 <sup>1</sup> MRC and Asthma UK Centre in Allergic Mechanisms of Asthma, King's College London,  
19 Guy's Hospital, London UK, SE1 9RT

20 <sup>2</sup> William Harvey Research Institute, Barts and The London School of Medicine and Dentistry,  
21 Queen Mary University of London, Charterhouse Square, London UK, EC1M 6BQ

22 <sup>3</sup> Department of Infection, Immunity and Inflammation, Institute for Lung Health, University of  
23 Leicester and NIHR Leicester Biomedical Research Centre – Respiratory, Glenfield Hospital,  
24 Leicester UK, LE3 9QP

25 <sup>4</sup> MRC-PHE Centre for Environment and Health and NIHR HPRU in Health Impact of  
26 Environmental Hazards, King's College London, Franklin Wilkins Building, London UK, SE1  
27 9NH

28

29 **Corresponding author:**

30 Dr Catherine M Hawrylowicz,

31 MRC and Asthma UK Centre in Allergic Mechanisms of Asthma,

32 5th Floor Tower Wing, Guy's Hospital, King's College London, London SE1 9RT, UK.

33 Phone: +44 (0) 207 188 0598

34 Email: [catherine.hawrylowicz@kcl.ac.uk](mailto:catherine.hawrylowicz@kcl.ac.uk)

35

36

37 **Keywords**

38 Particulate matter, vitamin D, asthma, bronchial epithelial cell, oxidative stress

39

## 40 **Abstract**

41 **Background:** Particulate matter (PM) pollutant exposure, which induces oxidative stress and  
42 inflammation, and vitamin D insufficiency, which compromises immune regulation, are  
43 detrimental in asthma.

44 **Objectives:** Mechanistic cell culture experiments were undertaken to ascertain whether  
45 vitamin D abrogates PM-induced inflammatory responses of human bronchial epithelial cells  
46 (HBECs) through enhancement of antioxidant pathways.

47 **Methods:** Transcriptome analysis, PCR and ELISA were undertaken to delineate markers of  
48 inflammation and oxidative stress; with comparison of expression in primary HBECs from  
49 healthy and asthmatic donors cultured with reference urban PM in the presence/absence of  
50 vitamin D.

51 **Results:** Transcriptome analysis identified over 500 genes significantly perturbed by PM-  
52 stimulation, including multiple pro-inflammatory cytokines. Vitamin D altered expression of a  
53 subset of these PM-induced genes, including suppressing *IL6*. Addition of vitamin D  
54 suppressed PM-stimulated IL-6 production, although to significantly greater extent in healthy  
55 versus asthmatic donor cultures. Vitamin D also differentially affected PM-stimulated GM-  
56 CSF, with suppression in healthy HBECs and enhancement in asthmatic cultures. Vitamin D  
57 increased HBEC expression of the antioxidant pathway gene *G6PD*, increased the ratio of  
58 reduced to oxidised glutathione, and in PM-stimulated cultures decreased the formation of 8-  
59 isoprostane. Pre-treatment with vitamin D decreased CXCL8 and further decreased IL-6  
60 production in PM-stimulated cultures, an effect abrogated by inhibition of G6PD with DHEA,  
61 supporting a role for this pathway in the anti-inflammatory actions of vitamin D.

62 **Conclusions:** In a study using HBECs from 18 donors, vitamin D enhanced HBEC  
63 antioxidant responses and modulated the immune response to PM, suggesting that vitamin D  
64 may protect the airways from pathological pollution-induced inflammation.

## 65 Introduction

66 Asthma is the most common chronic lung disease with globally increasing  
67 prevalence, implying the importance of environmental factors in its aetiology [1]. Vitamin D  
68 insufficiency/deficiency and ambient air pollution are two major environmental factors that  
69 appear to influence the pathogenesis and stability of asthma [2] [3] [4] [5], as well as other  
70 respiratory diseases [6] [7]. However there remains debate resulting from the heterogeneity  
71 of findings relating to the effects of these environmental factors on airway pathology [5] [8] [9]  
72 [10]. For example, European studies have shown heterogeneity between different cities in  
73 the magnitude of the effects of pollution on health outcomes such as hospital admissions for  
74 respiratory diseases [9] and asthma incidence [11], despite using standardised analyses.  
75 Environment-environment interactions are a major possible explanation for inconsistent  
76 results between different patient cohorts but have been little studied, particularly at the  
77 mechanistic level. In a recent meta-analysis, latitude of study location influenced  
78 associations between air pollutants and severe asthma exacerbations, and latitude is also  
79 known to affect sunlight-derived vitamin D production, although this association is  
80 complicated by other factors such as hours of daily skin exposure to sunlight [5]. In the  
81 urban environment Rosser and colleagues have shown that vitamin D insufficient children,  
82 but not those vitamin D sufficient, living close to major roads show an elevated risk of severe  
83 asthma exacerbations [12], although the mechanisms by which vitamin D may protect  
84 against pollution toxicity remain unclear and the interaction likely complex.

85

86 A growing body of research highlights the importance of epithelial immunology in  
87 asthma [13]. Evidence shows that inhaled ambient particulate matter (PM) adversely affects  
88 the bronchial epithelium through various mechanisms including the imposition of oxidative  
89 stress, which stimulates redox sensitive signalling pathways and drives the transcription of  
90 pro-inflammatory mediators relevant to asthma and other inflammatory lung diseases [14].  
91 There is evidence that in asthma this pro-oxidant/pro-inflammatory action is superimposed

92 on a background of oxidative stress. For example, Teng and colleagues have shown  
93 concentrations of H<sub>2</sub>O<sub>2</sub> are elevated in exhaled breath condensate of asthmatics compared  
94 with controls, with concentrations increasing with asthma severity [15]. Mak and colleagues  
95 have reported elevated plasma concentrations of 8-isoprostane, a lipid peroxide marker of  
96 oxidative stress, during asthma exacerbations [16]. Indeed oxidative stress has been  
97 implicated in many of the key pathophysiological features of asthma, including airways  
98 hyper-responsiveness and mucus hypersecretion (reviewed by Zuo *et al.* [17], and Li *et al.*  
99 [18]).

100

101         There is a large volume of research highlighting the anti-inflammatory effects of  
102 vitamin D on the adaptive immune system [19] [20], but limited research as to the effects of  
103 vitamin D on the human bronchial epithelium. Hansdottir and colleagues have shown vitamin  
104 D to decrease production of pro-inflammatory cytokines by virally infected primary human  
105 bronchial epithelial cells (HBECS) [21], but the capacity of vitamin D to affect the epithelial  
106 response to urban particulate matter, consistent with it acting as a modifier of PM-induced  
107 respiratory effects, to our knowledge has never been examined.

108

109         In view of this, we set out to examine whether vitamin D could abrogate urban PM-  
110 induced pro-inflammatory responses in primary human bronchial epithelial cells. We elected  
111 to commence with an unbiased, transcriptomic analysis with the objective of identifying PM-  
112 induced pro-inflammatory cytokines that show distinct patterns of alteration by vitamin D *in*  
113 *vitro*. We studied the epithelial response to both active 1 $\alpha$ ,25-dihydroxyvitamin D<sub>3</sub>  
114 (1,25(OH)<sub>2</sub>D<sub>3</sub>) but also to vitamin D in its circulating precursor form as 25-hydroxyvitamin D<sub>3</sub>  
115 (25(OH)D<sub>3</sub>). To examine the effects in a broader human context we studied epithelial cells  
116 from both patients with diagnosed asthma and those without. We hypothesised that HBECS  
117 from asthmatic, as compared with healthy control subjects, would display an enhanced pro-  
118 inflammatory cytokine response to ambient PM exposure. We further hypothesised that the

119 epithelial response to PM exposure could be favourably modified by vitamin D through  
120 induction of antioxidant defences.

121

## 122 **Materials and Methods**

123

### 124 **Materials**

125 NIST SRM1648a Urban Particulate Matter (National Institute of Standards &  
126 Technology, USA) was suspended at 500µg/ml in 5% methanol vehicle. SRM1648a is an  
127 urban total particulate matter reference material with mean particle diameter 5.85µm that  
128 was collected in the USA [22]. NIST SRM1648a in methanol vehicle, hereafter referred to as  
129 NIST, was prepared as follows. Appropriate weights of dry powder particulate matter were  
130 placed in a 50ml falcon tube to which 5% methanol (HPLC-grade) in Chelex-100 resin-  
131 treated water was added. Following re-suspension and sonication on ice at an amplitude of  
132 15 microns for 30 seconds using a Soniprep 150 plus probe sonicator (MES (UK) Ltd, UK),  
133 the resultant suspension was then separated into 1ml aliquots with resuspension during the  
134 aliquoting procedure to avoid PM sedimentation. The aliquots were stored at -70°C.  
135 Separate aliquots of the 5% methanol vehicle alone were also used as a vehicle control  
136 (VC). A NIST concentration of 50 µg/ml in primary HBEC cultures corresponded to a  
137 theoretical surface deposition of 11 µg/ cm<sup>2</sup>.

138 Ultra-high purity 1,25(OH)<sub>2</sub>D<sub>3</sub> (1α,25-dihydroxyvitamin D<sub>3</sub>; Enzo Life Sciences, UK)  
139 was aliquoted dissolved in DMSO (Sigma-Aldrich, UK) at 100µM. Ultra-high purity 25(OH)D<sub>3</sub>  
140 (25-hydroxyvitamin D<sub>3</sub>; Enzo Life Sciences, UK) was aliquoted dissolved in sterile absolute  
141 ethanol at 1mM. Both were prepared in low light conditions and stored at -80°C prior to use.  
142 Dehydroepiandrosterone (DHEA; Sigma-Aldrich, UK) was dissolved in absolute ethanol at  
143 100mM. Poly(I:C) (Invivogen, USA) was dissolved in sterile H<sub>2</sub>O at 1 mg/ml. Sulforaphane  
144 (Sigma-Aldrich, UK) was dissolved in DMSO at 300µM.

145

146 **Primary human bronchial epithelial cell (HBEC) culture**

147 Primary human bronchial epithelial cells (HBECs) were acquired from Lonza,  
 148 Switzerland, and locally from endobronchial brushings / biopsies obtained at fibreoptic  
 149 bronchoscopy with written informed consent of volunteers (Guy's Research Ethics  
 150 Committee, South London REC Office 3, REC approval number 09/H0804/108, 16/03/2010)  
 151 (Table 1).

152

153 **Table 1. Characteristics of donors of HBECs cultured in this study.**

| <b>Characteristic</b>                                      | <b>Healthy<br/>(n=10)</b> | <b>Asthmatic<br/>(n=8)</b>   |
|------------------------------------------------------------|---------------------------|------------------------------|
| from Lonza (n)                                             | 2                         | 2                            |
| from local bronchoscopy (n)                                | 8                         | 6                            |
| Gender                                                     | 6 male, 4 female          | 3 male, 5 female             |
| Age<br>Mean in years (Range)                               | 30.4<br>(19 – 60)         | 34.9<br>(24 – 52)            |
| % taking ICS *                                             | -                         | 83%                          |
| % taking LABA *                                            | -                         | 50%                          |
| % taking LTRA *                                            | -                         | 33%                          |
| Daily ICS Dose * Mean (Range)<br>Beclomethasone equivalent | -                         | 350 (0 – 1000)<br>micrograms |
| Post-BD FEV1 % predicted *<br>Mean (Range)                 | 105% (97% - 113%)         | 111% (86% - 144%)            |

154 BD, bronchodilator. ICS, inhaled corticosteroid. LABA, inhaled long-acting beta-2 agonist.  
 155 LTRA, leukotriene receptor antagonist. \* % data only for donors enrolled locally (Lonza  
 156 HBEC donors, for whom these data are not available, excluded).

157

158           For locally collected samples, non-smoking volunteers were phenotyped as atopic or  
159 non-atopic based upon skin-prick test results to a standard panel of aeroallergens, and as  
160 healthy or asthmatic, the latter based on clinical history and confirmation by lung function  
161 testing (documented variability in PEF/FEV<sub>1</sub> of 12% or more in past year, or positive  
162 metacholine / mannitol challenge if diagnosis uncertain).

163           Cells cultures were incubated in flasks in Bronchial Epithelial Cell Growth Medium  
164 (BEGM) – constituted by Bronchial Epithelial Basal Medium (BEBM; Lonza, Switzerland) with  
165 SingleQuot Supplements (Lonza, Switzerland) of Bovine Pituitary Extract, Insulin,  
166 Hydrocortisone, Gentamicin and Amphotericin-B, Retinoic Acid, Transferrin, Triiodothyronine,  
167 Epinephrine, and human Epidermal Growth Factor. In later experiments 1% Penicillin-  
168 Streptomycin solution (Sigma-Aldrich, UK) and 1% Nystatin suspension (Sigma-Aldrich, UK)  
169 were added to passage 0 and passage 1 cultures. Medium was changed every 2 to 3 days.

170           For samples grown from brushings: at bronchoscopy multiple brushings with an  
171 endobronchial brush were made to collect epithelial cells from 10 areas of the bronchial  
172 mucosa of normal appearance. The detached cells were washed with warmed BEGM and  
173 re-suspended in flasks of warmed BEGM then incubated at 37°C with 5% CO<sub>2</sub>. The medium  
174 was changed on the next day and the passage 0 cultures were then subcultured as  
175 described.

176           For samples grown from biopsies: small fragments of endobronchial biopsy with any  
177 visible smooth muscle removed by micro-dissection were placed in a universal tube  
178 containing 6ml warmed BEGM cell culture medium. Samples were treated with Liberase TL  
179 Research Grade (Roche, USA) collagenase (final concentration 62.5 µg/ml) for one hour at  
180 37°C then centrifuged twice in BEGM medium to wash off collagenase before transfer to a  
181 cell culture flask and incubation at 37°C with 5% CO<sub>2</sub>. The medium was changed on the  
182 next day and the passage 0 cultures were then subcultured as described.



183 Cell cultures once near-confluent were passaged by detachment of cells using the  
184 recommended Trypsin Subculture ReagentPack (Lonza, Switzerland), centrifugation and  
185 then re-suspension in fresh BEGM in flasks for further passage or flat-bottomed cell culture  
186 plates for experiments.

187 Flasks and culture plates for primary HBECs obtained locally at bronchoscopy were  
188 collagen coated before use – collagen solution was added to each flask / well base and  
189 incubated for 2 hours before washing 3 times with sterile H<sub>2</sub>O. Collagen solution comprised  
190 of 20µl type 1 calf skin collagen reagent (Sigma-Aldrich, UK) per ml 0.02M acetic acid in  
191 sterile H<sub>2</sub>O.

192 For experiments, once cultures were near-confluent medium was changed to BEGM  
193 containing all SingleQuot Supplements except Bovine Pituitary Extract, Retinoic Acid and in  
194 later experiments also excluding Hydrocortisone. Bovine Pituitary Extract was removed as it  
195 has been found to contain proteins that can provide exogenous protection against oxidative  
196 stress [23]. Bovine Pituitary Extract can also contain low concentrations of vitamin D [24].  
197 Retinoic acid was removed as there is some evidence that it may compete with / antagonise  
198 vitamin D [25]. For experiments examining effect of vitamin D pre-treatment, 25(OH)D<sub>3</sub> was  
199 added at 100nM final concentration with/without 100µM DHEA to appropriate wells. After a  
200 further 24 hours, cell cultures were stimulated using fresh BEGM (excluding relevant  
201 SingleQuot Supplements as above) with stimulation (50µg/ml NIST, 1µg/ml Poly(I:C)  
202 with/without 100nM 1,25(OH)D<sub>2</sub>3, 100nM 25(OH)D<sub>3</sub> and/or 100µM DHEA) as appropriate.  
203 Culture supernatants and lysed cell monolayers were harvested or other assays conducted 4  
204 hours or 24 hours after stimulation of cell cultures. Cell culture experiments were conducted  
205 with triplicate wells for each condition in each experiment to allow for variation in plating  
206 density with primary cells. For experiments epithelial cells were used between passage 3 and  
207 passage 5.

208

## 209 **Gene transcription microarray**

210 Total RNA was extracted from HBECs cultured for 24 hours stimulated with 50 µg/ml  
211 NIST and unstimulated, in the presence and absence of 100nM 1,25(OH)<sub>2</sub>D<sub>3</sub>, from four  
212 different donors (two healthy and two asthmatic). Cell culture monolayers were lysed with  
213 Qiazol reagent (QIAGEN, USA) then homogenised with QIAshredder columns before storage  
214 at -80°C pending extraction of total RNA using a miRNeasy Mini Kit (QIAGEN, USA)  
215 according to an adapted manufacturer's protocol with an off-column DNA digest with  
216 TurboDNase (Ambion, USA). mRNA was quantified using a Qubit Fluorimeter (Invitrogen,  
217 USA) and quality controlled using an Agilent 2100 Bioanalyser (Agilent Technologies, USA).  
218 Samples were prepared for array analysis using SuperScript III Reverse Transcriptase  
219 (Invitrogen, USA) and TargetAmp Nano-g Biotin-aRNA Labelling Kit (Epicentre, Illumina,  
220 USA). The microarray was conducted on Illumina HT-12v4 Expression BeadChips (Illumina,  
221 USA) on an iScan platform (Illumina, USA). Raw array signal intensities were processed in  
222 GenomeStudio (Illumina, USA) with a quantile normalisation before export for analysis in  
223 GenomicsSuite (Partek, USA). ANOVA analysis was conducted of the normalised data in  
224 GenomicsSuite (Partek, USA).

225

## 226 **Real-time quantitative Polymerase Chain Reaction (qPCR) for** 227 **measurement of gene mRNA expression**

228 Total RNA was extracted as above and quantified using a NanoDrop ND-1000  
229 Spectrophotometer (Thermo Scientific, USA) and then reverse transcribed to cDNA using  
230 RevertAid Reverse Transcriptase and complementary reagents (Fermentas, Thermo  
231 Scientific, USA). Relative Quantification (RQ) of target genes relative to 18S rRNA house-  
232 keeping gene was conducted in triplicates by real-time quantitative polymerase chain  
233 reaction (qPCR) using Taqman Universal PCR MasterMix (Applied Biosystems, USA), and  
234 an Applied Biosystems Viia 7 real-time thermal cycler. Results were analysed using Viia 7  
235 software (Applied Biosystems, USA). Taqman primers were purchased from Applied  
236 Biosystems, USA (S1 Table). Relative expression of mRNA was corrected for efficiency of

237 amplification using the Pfaffl method [26]. In experiments comparing different culture  
238 stimulations expression of genes was analysed relative to both 18S and the unstimulated  
239 control cultures ( $RQ_{Unstimulated}$ ).

240

## 241 **Cytokine protein measurement**

242 Culture supernatants from individual wells were stored at  $-20^{\circ}\text{C}$  pending  
243 measurement of secreted proteins from individual samples. Concentrations of cytokines  
244 were measured in culture supernatants by Cytometric Bead Array (CBA; BD Biosciences,  
245 USA). Supernatants were incubated for 3 hours with CBA capture beads before beads were  
246 washed and then incubated for 2 hours with CBA detection reagent followed by bead sample  
247 analysis as per manufacturer's instructions. Cytokine levels were measured separately for  
248 each of the triplicate wells in primary HBEC cultures and then mean averaged before further  
249 analysis.

250

## 251 **Oxidative stress assays**

252 8-Isoprostane ELISA: Cell culture supernatant, pooled from triplicate wells, was  
253 collected into tubes containing desferrioxamine (DFO) and butylated hydroxytoluene (BHT)  
254 and stored at  $-80^{\circ}\text{C}$  pending assay. 8-isoprostane was assayed using a commercial ELISA  
255 kit (Cayman Chemical, Michigan, USA) according to the manufacturers protocol.

256 Glutathione Assay: Intracellular total and oxidized glutathione were assessed using  
257 the GSH-GSSG-Glo Assay Kit (Promega, Wisconsin, USA) using an adapted protocol. The  
258 protocol was adapted as the un-adapted protocol resulted in readings outside the range of  
259 the luminometer standard curve. Near-confluent HBECs were cultured for 24 hours with  
260 100nM 25(OH)D<sub>3</sub>, with 6 wells per condition per experiment, in phenol-red free Airway  
261 Epithelial Cell Medium (Promocell, Germany) with all supplements except bovine pituitary  
262 extract, retinoic acid and hydrocortisone. After removal of supernatant, one triplicate of wells  
263 for each condition was lysed with kit passive lysis buffer (for assay of total glutathione) and

264 the second triplicate for each condition was lysed with kit lysis buffer containing N-  
265 ethylmaleimide (for assay of oxidized glutathione). The 50 $\mu$ l lysate in each well was then  
266 diluted by addition of 150 $\mu$ l dH<sub>2</sub>O, mixed on an orbital shaker, before 40 $\mu$ l of diluted lysate  
267 was transferred to white-sided (flat transparent-bottom) 96 well assay plates. A glutathione  
268 standard curve in lysis buffer was prepared according to kit protocol and 40 $\mu$ l added to  
269 appropriate wells. 10 $\mu$ l of prepared Luciferin-NT reagent was then added to each well and  
270 the plate incubated on an orbital shaker for 5 minutes. The assay was then completed  
271 according to the manufacturer's protocol. A solution of glutathione-S-transferase,  
272 dithiothreitol (DTT) and buffer was added to each well and the plate incubated for 30  
273 minutes. Finally, a luciferase containing reagent solution was then added to each well and  
274 the plate incubated for 20 minutes prior to reading well luminescence with a GloMax plate  
275 luminometer (Promega, Wisconsin, USA). For each condition in each experiment, the  
276 concentration of reduced glutathione was calculated by subtracting the mean concentration  
277 in the oxidized glutathione triplicate from the mean concentration in the total glutathione  
278 triplicate.

279

## 280 **Statistical Analysis**

281 GraphPad Prism 6.0 (GraphPad Software, USA) was used for all statistical tests  
282 except for the microarray data. Unless otherwise stated in figure legends, data are presented  
283 as mean +/- standard deviation (SD) for normally-distributed data and as box-and-whisker  
284 plots showing median, inter-quartile and absolute ranges for non-parametric data. Unless  
285 otherwise stated, non-parametric data were analysed using Friedman Tests with Dunn's  
286 multiple-comparisons test and parametric data by repeated-measures ANOVA with  
287 Bonferroni corrected post-tests. Significant results shown in figures as follows: \*,  $p \leq 0.05$ ;  
288 \*\*,  $p \leq 0.01$ ; \*\*\*,  $p \leq 0.001$ . In some experiments results from HBEC cultures from healthy  
289 (both atopic and non-atopic) and asthmatic subjects were combined to better analyse the  
290 effects of PM and vitamin D across a larger and broader population of individuals.

291

## 292 **Results**

293

### 294 **Effects of vitamin D on expression of pro-inflammatory cytokine** 295 **genes by HBECs exposed to particulate matter**

296 In initial studies to investigate vitamin D mediated inhibition of the pro-inflammatory  
297 effects of particulate matter, a gene transcription microarray was conducted on HBECs  
298 stimulated with PM for 24 hours, using cultures from four adult donors. Expression of 510  
299 genes was altered (fold-change  $\geq \pm 1.4$ ) upon stimulation with 50  $\mu\text{g/ml}$  NIST SRM1648a, a  
300 reference preparation of urban PM, hereafter referred to as NIST (full microarray data  
301 available in S1 Data Appendix). This concentration of NIST had previously been ascertained  
302 to induce significantly increased production of pro-inflammatory cytokines after 24 hour cell  
303 culture. Of these genes, 49 also showed evidence of regulation (fold-change  $\geq \pm 1.4$ ) in the  
304 presence of the active form of vitamin D,  $1,25(\text{OH})_2\text{D}_3$ , at a concentration of 100nM (Fig 1A,  
305 S2 Table). Expression of the pro-inflammatory cytokine genes *IL6*, *CXCL10* and *IL24* was  
306 induced by NIST, but suppressed by the addition of vitamin D (Fig 1B). Expression of other  
307 pro-inflammatory cytokine genes, for example *IL8*, was induced by NIST, but not altered by  
308 addition of vitamin D. In contrast, NIST suppressed and vitamin D increased the expression  
309 of *TGFB2*. As previously reported [27], vitamin D induced expression of *IL1RL1* but  
310 interestingly this was also induced by NIST stimulation.

311

#### 312 **Fig 1. Transcription microarray of 24 hour primary human bronchial epithelial cell** 313 **(HBEC) cultures stimulated with NIST in the presence/absence of vitamin D.**

314 (A) Volcano plot of the 510 genes with  $\geq 1.4$  fold differential expression comparing  
315 50 $\mu\text{g/ml}$  NIST stimulated to unstimulated 24 hour cultures (n=4), showing fold-change in  
316 gene expression in NIST stimulated cultures in the presence vs absence of 100nM

317 1,25(OH)<sub>2</sub>D3 (horizontal axis) plotted again probability of statistical significance for that fold-  
318 change (vertical axis).

319 (B) Plot showing microarray results for fold-change in expression of all cytokine genes  
320 upon stimulation of HBECs with 50µg/ml NIST (horizontal axis) and fold-change in gene  
321 expression upon addition of 100nM 1,25(OH)<sub>2</sub>D3 to NIST-stimulated cultures (vertical axis).

322

323 The microarray findings were validated by quantitative real-time PCR using HBEC  
324 cultures from a larger number of donors with expression of cytokine genes of interest studied  
325 in both 4 hour and 24 hour cultures (Fig 2). Exposure of HBECs to NIST *in vitro* significantly  
326 upregulated expression of mRNA encoding *IL6*, *IL8*, *IL24* and *CXCL10* after 4 hours and 24  
327 hours of culture. Expression of *CSF2* was significantly increased by NIST stimulation at 24  
328 hours but not significantly at 4 hours. Co-culture with 100 nM 1,25(OH)<sub>2</sub>D3 reduced *IL6*,  
329 *IL24* and *CXCL10* expression at both time points although the effect of vitamin D on *CXCL10*  
330 expression at 24 hours did not attain statistical significance. NIST-induced *IL8* expression  
331 was not significantly altered by vitamin D at 4 hours but was decreased by 1,25(OH)<sub>2</sub>D3 at  
332 24 hours.

333

334 **Fig 2. Confirmation by qPCR of the effect of NIST and vitamin D on expression of**  
335 **cytokine genes in HBEC cultures.**

336 (A) Gene mRNA expression at 4 hours relative to *18S* and the unstimulated Control  
337 condition in HBEC cultures stimulated with 50µg/ml NIST in the presence/absence of 100nM  
338 1,25(OH)<sub>2</sub>D3. *IL6*, n=7; *IL8*, n=7; *IL24*, n=6; *CFS2*, n=8; *CXCL10*, n=6; *TGFB2*, n=6.

339 (B) mRNA expression at 24 hours. *IL6*, n=9; *IL8*, n=7; *IL24*, n=6; *CFS2*, n=8; *CXCL10*,  
340 n=6 (one outlying replicate excluded); *TGFB2*, n=6. All repeated-measures ANOVAs and  
341 post-tests with Bonferroni corrections as shown. VC; vehicle control for NIST. Statistical  
342 significance as follows: \*, p ≤ 0.05; \*\*, p ≤ 0.01; \*\*\*, p ≤ 0.001; \*\*\*\*, p ≤ 0.0001.

343

344 **Comparison of the effects of vitamin D on PM-stimulated epithelial**  
345 **cytokine production by HBECs from healthy and asthmatic**  
346 **individuals *in vitro***

347 Production by HBECs of the pro-inflammatory cytokines IL-6, CXCL8 and GM-CSF  
348 (encoded by the genes *IL6*, *IL8* and *CSF2* respectively) was chosen for further scrutiny given  
349 that all three mediators are featured in asthma pathophysiology and their expression was  
350 induced by NIST-stimulation, but differently affected by the additional presence of vitamin D.  
351 Culture of primary HBECs from 14-17 donors per experiment (approximately equal numbers  
352 of healthy and asthmatic subjects) for 24 hours in the presence of 50 µg/ml NIST significantly  
353 increased the supernatant concentrations of IL-6, CXCL8 and GM-CSF as compared with  
354 vehicle control, consistent with the gene expression data (Fig 3A). In the additional presence  
355 of 100nM 1,25(OH)<sub>2</sub>D<sub>3</sub> throughout the 24 hour stimulation, production of IL-6 was  
356 significantly inhibited, but that of CXCL8 or GM-CSF not significantly altered (Fig 3A).

357

358 **Fig 3. Effects of 1,25(OH)<sub>2</sub>D<sub>3</sub> on production of IL-6, CXCL8 and GM-CSF by NIST**  
359 **stimulated HBEC cultures.**

360 (A) Addition of 100nM 1,25(OH)<sub>2</sub>D<sub>3</sub> reduced production of IL-6 by primary HBEC  
361 cultures stimulated for 24 hours with 50µg/ml NIST, but not CXCL8 or GM-CSF. VC: NIST  
362 vehicle control. n=14-17.

363 (B) Fold-increase in production of IL-6, CXCL8, and GM-CSF above that in unstimulated  
364 cultures upon stimulation with 50µg/ml NIST in the presence/absence of 1,25(OH)<sub>2</sub>D<sub>3</sub>, by  
365 disease status. Two-way ANOVAs with Bonferroni-corrected post-tests. n=8-9 healthy, n=7-8  
366 asthmatic.

367 (C) Percentage suppression by 1,25(OH)<sub>2</sub>D<sub>3</sub> of cytokine production in PM-stimulated  
368 cultures of HBECs from healthy donors compared to asthmatic donors. Un-paired t-tests.  
369 n=8-9 healthy, n=7-8 asthmatic. Statistical significance as follows: \*, p ≤ 0.05; \*\*, p ≤ 0.01;  
370 \*\*\*, p ≤ 0.001, \*\*\*\*, p ≤ 0.0001.

371

372 Spontaneous production of all three of these cytokines by HBECs from both the non-  
373 diseased and asthmatic donors varied considerably between individuals, with no significant  
374 difference between the asthmatic group and healthy group (S1 Fig). To allow for this inter-  
375 individual variation, NIST responses were also examined in terms of fold-changes above  
376 spontaneous production in unstimulated cultures. Contrary to our hypothesis, NIST-induced  
377 fold-increases in cytokine production were not significantly greater in HBECs from asthmatic  
378 compared to healthy subjects in the absence of vitamin D (Fig 3B). Nevertheless,  
379 1,25(OH)<sub>2</sub>D<sub>3</sub> exhibited a significantly greater capacity to suppress NIST-stimulated IL-6  
380 production by HBECs from the non-diseased, compared with the asthmatic donors (Fig 3C).  
381 There was also a significant difference in the effect of 1,25(OH)<sub>2</sub>D<sub>3</sub> on NIST-induced GM-  
382 CSF production, with suppression in cell cultures from the non-diseased donors, but  
383 enhancement in those from the asthmatic donors. As a result, in NIST-stimulated vitamin D  
384 treated cultures induction of IL-6 and GM-CSF production was significantly greater in  
385 asthmatic than in healthy HBECs (Fig 3B). There was no significant difference in the effect  
386 of vitamin D on CXCL8 production by HBECs from the non-diseased and asthmatic donors.

387

388 We examined the possibility that these differences in the effects of 1,25(OH)<sub>2</sub>D<sub>3</sub> on  
389 IL-6 and GM-CSF protein production reflected differences in early induction of cytokine gene  
390 expression. No significant differences were evident between cultures of HBECs from healthy  
391 and asthmatic donors in NIST-stimulated induction of *IL6* or *CSF2* at 4 hours and 24 hours,  
392 compared in the presence and absence of 1,25(OH)<sub>2</sub>D<sub>3</sub> (two-way ANOVA analyses, S2 Fig).  
393 Additionally, gene expression was compared with the capacity of vitamin D to suppress  
394 cytokine production. A proportion of HBEC donor cultures showed greater induction of *CSF2*  
395 at 4 hours with less suppression of GM-CSF production at 24 hours by vitamin D (S2 Fig),  
396 and notably these were from asthmatic donors. A similar pattern was not evident for IL-6 (S2  
397 Fig).



398

399 **Comparison of capacity for 25(OH)D<sub>3</sub> and 1,25(OH)<sub>2</sub>D<sub>3</sub> to modulate**  
400 **HBEC cytokine responses**

401 Exposure of HBECs to NIST (50 µg/ml, 24 hours) significantly increased the  
402 expression of the gene *CYP27B1* (S3 Fig), encoding the cytochrome P450 enzyme that  
403 converts 25(OH)D<sub>3</sub> to active 1,25(OH)<sub>2</sub>D<sub>3</sub>. However, the magnitude of induction of  
404 *CYP27B1* with NIST exposure was significantly lower than that observed with the established  
405 TLR3 agonist Poly(I:C) (mean (SD) 1.2 (0.22) fold induction with NIST compared to 5.4 (3.3)  
406 fold induction with TLR3 agonist) (S3 Fig). Similarly, exposure to NIST modestly, but  
407 significantly, increased expression of *VDR*, encoding the vitamin D receptor (S3 Fig).  
408 Concordantly, both 25(OH)D<sub>3</sub> and 1,25(OH)<sub>2</sub>D<sub>3</sub> at 100nM concentrations exerted similar  
409 effects on cytokine expression by NIST-stimulated HBECs (S3 Fig).

410

411 Given the distinct effects of vitamin D on cytokine gene expression in HBECs from  
412 healthy compared to asthmatic donors, we were interested to investigate whether this  
413 reflected differences in their capacity to respond to vitamin D. We therefore assessed  
414 expression of *CAMP*, the gene encoding cathelicidin, and *CYP24A1*; two genes known to be  
415 strongly induced by 1,25(OH)<sub>2</sub>D<sub>3</sub> (Fig 4). No significant differences were apparent between  
416 cells from healthy and asthmatic donors in the capacity of 100nm 1,25(OH)<sub>2</sub>D<sub>3</sub>, in the  
417 presence of NIST, to induce increased expression of *CYP24A1* or *CAMP* relative to  
418 unstimulated controls (Fig 4A,C). Similarly expression of the target genes relative to *18S* in  
419 the stimulated condition were not significantly different between cultures from healthy and  
420 asthmatic donors (Figs 4B,D).

421

422 **Fig 4. Comparison of expression of vitamin D axis genes between HBECs from healthy**  
423 **and asthmatic donors.**

424 (A) Induction of *CYP24A1* by NIST with 100nM 1,25(OH)<sub>2</sub>D<sub>3</sub>, relative to the unstimulated  
425 control condition, in 4 hour and 24 hour HBEC cultures. H, Healthy donor HBECs; A,  
426 Asthmatic donor HBEC cultures. 4hr healthy, n=5; 4hr asthmatic, n=5; 24hr healthy, n=7;  
427 24hr asthmatic, n=6.

428 (B) Expression of *CYP24A1* as measured by qPCR relative to *18S* in 4 hour and 24 hour  
429 HBEC cultures stimulated with 50µg/ml NIST and 100nM 1,25(OH)<sub>2</sub>D<sub>3</sub>. 4hr healthy, n=5; 4hr  
430 asthmatic, n=5; 24hr healthy, n=7-8; 24hr asthmatic, n=6.

431 (C) Induction of *CAMP* by NIST with 100nM 1,25(OH)<sub>2</sub>D<sub>3</sub>, relative to the unstimulated control  
432 condition, in 4 hour and 24 hour HBEC cultures. 4hr healthy, n=5; 4hr asthmatic, n=5; 24hr  
433 healthy, n=5; 24hr asthmatic, n=6.

434 (D) Expression of *CAMP* as measured by qPCR relative to *18S* in 4 hour and 24 hour HBEC  
435 cultures stimulated with 50µg/ml NIST and 100nM 1,25(OH)<sub>2</sub>D<sub>3</sub>. 4hr healthy, n=5; 4hr  
436 asthmatic, n=5; 24hr healthy, n=7; 24hr asthmatic, n=6.

437

## 438 **Effects of vitamin D on HBEC oxidative stress and antioxidant** 439 **responses**

440 We next sought to establish whether the anti-inflammatory effects of vitamin D  
441 following PM challenge were related to its upregulation of antioxidant pathways. Culture of  
442 HBECs with 100nM 25(OH)D<sub>3</sub> for 24 hours significantly increased the intracellular ratio of  
443 reduced to oxidised glutathione concentrations (GSH:GSSG; Fig 5A), and in NIST-stimulated  
444 cultures 100nM 25(OH)D<sub>3</sub> significantly decreased the production of the lipid oxidation  
445 product 8-isoprostane (Fig 5B). In further support of an antioxidant action of vitamin D, the  
446 antioxidant enzyme-inducing compound sulforaphane similarly suppressed production of IL-  
447 6, but not CXCL8 or GM-CSF (Fig 6) in NIST-stimulated cultures.

448

449 **Fig 5. Effect of 25(OH)D<sub>3</sub> on antioxidant responses in primary HBEC cultures.**

450 (A) Ratio of reduced (GSH) to oxidised (GSSG) glutathione in 24 hour cultures of HBECs  
451 treated with 100nM 25(OH)D3; n=6.

452 (B) Fold-increase in 8-isoprostane levels in culture supernatants from primary HBECs  
453 cultured with 50µg/ml NIST with/without 100nM 25(OH)D3 for 24 hours, compared to VC  
454 control cultures; ratio paired t-test, n=8. Statistical significance as follows: \*,  $p \leq 0.05$ .

455

456 **Fig 6. Effect of antioxidant enzyme-inducing sulforaphane on production of IL-6,**  
457 **CXCL8 and GM-CSF by NIST-stimulation HBECs.**

458 Cytokines produced by primary HBECs in submerged cultures for 24 hours stimulated with  
459 NIST at 50µg/ml and/or sulforaphane at 3µM. Friedman's tests with Dunn's multiple  
460 comparisons tests; n=4. Statistical significance as follows: \*\*,  $p \leq 0.01$ .

461

462 The transcriptomic analysis described above revealed that expression of the gene  
463 *G6PD*, which encodes the key antioxidant enzyme glucose-6-phosphate dehydrogenase  
464 (G6PD) [28], was significantly upregulated by vitamin D (1.82 fold-increase for NIST +  
465 1,25(OH)<sub>2</sub>D3 compared to NIST alone; Fig 1). The capacity of 1,25(OH)<sub>2</sub>D3 to elevate  
466 expression of *G6PD* was confirmed by qPCR in HBEC cultures treated with 100 nM  
467 1,25(OH)<sub>2</sub>D3 for 4 hours and 24 hours (both  $p < 0.001$ ; Fig 7A and B). 25(OH)D3 similarly  
468 enhanced *G6PD* expression in a concentration-dependent manner (Fig 7B). There were no  
469 significant differences between asthmatic and healthy donor cultures in spontaneous  
470 expression of *G6PD* in unstimulated cultures at 4 hours and 24 hours (Fig 7C). Additionally  
471 there were no significant differences in the capacity of NIST with/without 1,25(OH)<sub>2</sub>D3 to  
472 induce expression of *G6PD* above that in unstimulated cultures (Fig 7D) in HBECs from  
473 asthmatics compared to healthy donors.

474

475 **Fig 7: Capacity of vitamin D to enhance primary HBEC expression of *G6PD*.**

476 (A) Expression of *G6PD* in 4 hour cultures of primary HBECs stimulated with 50µg/ml  
477 NIST with/without 100nM 1,25(OH)<sub>2</sub>D3 (n=6).

478 (B) Expression of *G6PD* in 24 hour cultures of primary HBECs stimulated with 50ug/ml  
479 NIST with/without 100nM 1,25(OH)<sub>2</sub>D3 (n=6) or a concentration series of 25(OH)D3, n=5.

480 (C) Expression of *G6PD* as measured by qPCR relative to *18S* in unstimulated 4 hour  
481 and 24 hour HBEC cultures. H, Healthy donor HBECs; A, Asthmatic donor HBEC cultures.  
482 4hr healthy, n=5; 4hr asthmatic, n=5; 24hr healthy, n=8; 24hr asthmatic, n=6.

483 (D) Induction of *G6PD* by 50µg/ml NIST in the presence / absence of 100nM  
484 1,25(OH)<sub>2</sub>D3 in 4 hour and 24 hour cultures of HBECs from healthy and asthmatic donors.  
485 4hr healthy, n=5; 4hr asthmatic, n=5; 24hr healthy, n=6; 24hr asthmatic, n=6. Statistical  
486 significance as follows: \*,  $p \leq 0.05$ ; \*\*,  $p \leq 0.01$ ; \*\*\*,  $p \leq 0.001$ ; \*\*\*\*,  $p \leq 0.0001$ .

487

## 488 **Assessing the capacity of vitamin D pre-treatment to suppress pro-** 489 **inflammatory cytokine production by NIST-stimulated HBECs**

490 Since greater induction by vitamin D of *G6PD* was evident in the HBECs at 24 hours  
491 compared with 4 hours in the preceding experiments, we finally investigated whether 24  
492 hours pre-treatment of HBEC cultures with vitamin D prior to particulate challenge would  
493 further augment its capacity to decrease production of pro-inflammatory cytokines.  
494 Accordingly, we compared the effects of concurrent treatment with 100 nM 25(OH)D3 (as in  
495 the previous experiments above) with those of additional treatment of the HBECs with 100  
496 nM 25(OH)D3 for 24 hours prior to exposure to NIST-stimulation (Fig 8A). Additional vitamin  
497 D pre-treatment of NIST-stimulated HBECs significantly increased the percentage  
498 suppression of IL-6 production (Fig 8A). Vitamin D pre-treatment also suppressed NIST-  
499 induced CXCL8 production, a phenomenon not observed when vitamin D was added only  
500 concurrently with NIST. However, suppression of IL-6 production (44.78%, 18.45% - 71.10%  
501 [mean, 95% confidence interval]) was greater than that of CXCL8 (22.36%, -1.42% -  
502 46.14%). In contrast, there was no significant effect on NIST-induced GM-CSF production.  
503

504 The possible contribution of enhanced expression of G6PD to this phenomenon was  
505 assessed using the G6PD inhibitor dehydroepiandrosterone (DHEA). DHEA at a  
506 concentration of 100  $\mu$ M significantly abrogated the ability of 100nM 25(OH)D3, applied for  
507 24 hours in advance and with NIST stimulation, to suppress CXCL8 production in NIST-  
508 stimulated HBEC cultures with evidence of a trend towards decreasing suppression of IL-6  
509 (Fig 8B).

510

511 **Fig 8: Effect of vitamin D pre-treatment of HBEC cultures on suppression of NIST**  
512 **induced IL-6 and CXCL8.**

513 (A) Percentage suppression of cytokine production in 50 $\mu$ g/ml NIST stimulated 24 hour  
514 cultures by concurrent and additional 24 hour pre-treatment with 100nM 25(OH)D3  
515 compared to concurrent only; n=7-9 (3-4 Healthy, 4-5 Asthmatic). Two-tailed paired t-tests.

516 (B) Percentage suppression of cytokine production by 100nM 25(OH)D3 concurrent and  
517 pre-treatment in 50 $\mu$ g/ml NIST stimulated HBEC cultures, in the absence or presence of the  
518 G6PD inhibitor DHEA at 100 $\mu$ M; n=7-9 (2-3 Healthy, 5-6 Asthmatic). Two-tailed paired t-  
519 tests. Statistical significance as follows: \*,  $p \leq 0.05$ ; \*\*,  $p \leq 0.01$ .

520

## 521 Discussion

522 Particulate matter air pollution and vitamin D deficiency are environmental factors that  
523 have both been implicated in the current 'epidemic' of asthma [1] [7] [19]. There is increasing  
524 appreciation of the importance of the interaction between multiple environmental factors,  
525 defining an individual's total exposome, in determining health effects, but to date the  
526 interactive effect of vitamin D on responses to air pollution has received little attention [5] [29]  
527 [30]. In the present study we demonstrate that vitamin D abrogates pro-inflammatory effects  
528 of urban PM on primary human bronchial epithelial cells, suppressing production of key PM-  
529 stimulated pro-inflammatory cytokines, such as IL-6, through a mechanism at least in part  
530 dependent on enhancement of antioxidant pathways by vitamin D. Although epithelial cells

531 from both healthy and asthmatic donors were responsive to vitamin D, the capacity for  
532 vitamin D to suppress PM-induced production of pro-inflammatory cytokines was impaired in  
533 cells from patients with asthma compared to healthy subjects in this study. A microarray was  
534 employed to generate an unbiased depiction of the effects of these environmental factors on  
535 epithelial cytokine responses and additionally identified further vitamin D promoted genes  
536 such as *G6PD* and *TGFB2*.

537

538 Multiple pro-inflammatory cytokines were induced by PM-stimulation, however, the  
539 effect of vitamin D on cytokine responses was not uniform with *IL6*, *CXCL10* and *IL24*  
540 transcripts suppressed by vitamin D, whereas others such as *IL8* and *CSF2* were not  
541 similarly inhibited. We subsequently focused on IL-6, CXCL8 and GM-CSF as these  
542 cytokines are well-established to be up-regulated by PM exposure, as well as being  
543 implicated in the pathogenesis of asthma, with elevated concentrations seen in lungs of  
544 asthmatic individuals [31] [32] [33] [34]. IL-6 is implicated in systemic inflammation [35] [36]  
545 [37]. CXCL8 (IL-8) has a major role in neutrophil chemotaxis and activation, with also  
546 evidence for a role in eosinophil chemotaxis [38]. GM-CSF is a known HBEC-derived  
547 mediator that enhances the pro-inflammatory effects of PM on dendritic cells (DCs) [39] and  
548 promotes eosinophil responses [40], but may protect against oxidative injury under a variety  
549 of situations [41] [42].

550

551 Vitamin D suppressed PM-induced IL-6 production to a greater extent in cultured  
552 epithelial cells from healthy as compared with asthmatic donors. In contrast, in cultures from  
553 asthmatic donors vitamin D modestly increased GM-CSF production. Why healthy and  
554 asthmatic HBECs in this study responded differently to vitamin D is unclear, and future  
555 research is needed to address this issue and verify findings in a larger cohort.  
556 Nevertheless, this novel finding suggests that future research studying the role of vitamin D  
557 in disease pathology should be conducted using primary cells from individuals with those

558 diseases given the important differences apparent between the vitamin D responses of cells  
559 from healthy and diseased donors.

560

561 Vitamin D exhibits both inhibitory and inductive effects of importance in chronic  
562 airway diseases and is therefore likely to influence the response of the lung to pollution  
563 exposure. For example, any action of vitamin D to decrease PM-stimulated IL-6 production  
564 is likely to be clinically relevant and beneficial. Higher concentrations of IL-6 have been  
565 shown in induced sputum from asthmatic patients compared to controls [31], in the plasma of  
566 asthmatic patients [43], and a genome-wide association study has previously highlighted the  
567 IL-6 receptor gene locus as a possible risk locus for asthma [44]. *In vivo* human exposure to  
568 PM has been shown to increase both airway and systemic concentrations of IL-6, with  
569 associated acute neutrophilic inflammation [35] [45]. IL-6 can stimulate proliferation of  
570 lymphocytes [46], inhibit the action of regulatory T lymphocytes (Tregs) [37] and conversely  
571 enhance Th17/IL-17 synthesis [47], which is associated with neutrophilic inflammation and  
572 steroid insensitivity in asthma [48]. Elevated IL-17A has been reported with both *in vitro* and  
573 *in vivo* particulate matter exposure [49] [50]. Furthermore, the benefit of reducing pollution-  
574 induced IL-6 is likely broader than its effect on airway inflammation, since pollution-induced  
575 vascular dysfunction and increased blood coagulation have been shown to be IL-6  
576 dependent in murine models [35] [36].

577 In contrast vitamin D up-regulated expression of *TGFB2*, a cytokine with the capacity  
578 to both inhibit inflammation and promote wound healing/fibrosis, with PM having the  
579 reciprocal effect. Whilst PM-stimulation creates an immune microenvironment that promotes  
580 pro-inflammatory leukocyte responses, vitamin D appears to have the capacity to regulate  
581 the production by epithelial cells of multiple mediators that act on the adaptive immune  
582 system, such as the cytokines above and as we recently described sST2 [27], to produce a  
583 less inflammatory microenvironment.

584

585 Vitamin D enhanced expression of the gene *G6PD* encoding glucose-6-phosphate  
586 dehydrogenase, the rate-limiting step in the generation of NADPH, necessary for the action  
587 of critical antioxidant enzymes including those involved in the production of reduced  
588 glutathione [28]. In keeping with this action to enhance antioxidant pathways, vitamin D  
589 increased the ratio of intracellular reduced to oxidized glutathione and decreased the  
590 production of 8-isoprostane. This action of vitamin D is consistent with previous evidence  
591 that it can protect various other types of epithelial cell from oxidative stress *in vitro*, including  
592 H<sub>2</sub>O<sub>2</sub>-treated prostatic and breast epithelial cells [51] [52] and CoCl<sub>2</sub>-treated trophoblasts  
593 [53]. Similarly, using immortalised epithelial cell lines, notwithstanding that immortalised cell  
594 lines are known to manifest distinctly different responses to vitamin D [54], it has been shown  
595 that vitamin D can abrogate impairment caused by oxidative stress of nuclear translocation of  
596 the ligand bound glucocorticoid receptor [55].

597 This action of vitamin D to enhance antioxidant pathways and mitigate against  
598 oxidative stress likely contributes to its capacity to suppress IL-6 production by PM-  
599 stimulated HBECs. Consistent with this are our observed effects of sulforaphane in cell  
600 culture and the findings of Sienna-Monge *et al.* that antioxidant supplementation of children  
601 significantly decreases nasal lavage concentrations of IL-6 but not CXCL8 [56]. Oxidative  
602 stress has also been shown to contribute to corticosteroid resistance, a major feature of  
603 severe asthma [57], and we have previously shown that vitamin D exerts a steroid-sensitising  
604 action in severe asthma, restoring dexamethasone-induced IL-10 production by T cells [58].

605 However the capacity of vitamin D to suppress production of cytokines such as IL-6 is  
606 likely multifactorial since vitamin D also has the propensity to inhibit other signalling  
607 pathways, such as those involving nuclear factor kappa-B (NFκB) [21] and mitogen-activated  
608 protein kinase (MAPK) [59]. The differing effects of vitamin D on IL-6, CXCL8 and GM-CSF  
609 reveals the complex actions of vitamin D on the multiple intracellular signalling pathways in  
610 the induction of each cytokine. The suppression of IL-6 by vitamin D in our *in vitro* cultures is  
611 consistent with the previous finding of Codoner-Franch *et al.* that systemic concentrations of



612 IL-6 in obese children were significantly higher in those with lower serum vitamin D  
613 concentrations [60].

614

615 A limitation of this research is that the detailed series of mechanistic experiments  
616 could only be conducted with epithelial cell cultures from a limited number of healthy and  
617 asthmatic donors. Furthermore the asthmatic donors were predominantly of mild severity  
618 and atopic; whether cells isolated from more severe and non-atopic asthmatics would  
619 respond similarly is an important consideration. The impact of asthma medications on these  
620 responses is also an important question but could not be analysed with this sample  
621 population. It is therefore reassuring that our findings are consistent with *in vivo* cytokine  
622 responses as discussed above [56] [60]. Furthermore our results are consistent with the  
623 epidemiological study of Rosser and colleagues that showed vitamin D insufficient children  
624 living close to major roads have an increased risk of severe asthma exacerbations [12].  
625 Importantly the concentrations of vitamin D and particulate matter used in this research are  
626 representative of the concentrations evident in the real world. Li *et al.* have reconciled  
627 theoretical and experimental particulate airway deposition, allowing for increased deposition  
628 at airway bifurcation points with uneven air flow in disease, and shown PM<sub>2.5</sub> deposition  
629 concentrations of 0.2–20 µg/cm<sup>2</sup> are representative for real-world exposure [18] with higher  
630 deposition concentrations for total particulate matter. Circulating serum levels of 25-  
631 hydroxylated vitamin D are in the range 75nmol – 150nmol in sufficient individuals, and  
632 therefore an *in vitro* concentration of 100nmol 25(OH)D<sub>3</sub> is representative of real-world  
633 vitamin D sufficiency. With respect to 1,25(OH)<sub>2</sub>D<sub>3</sub> there is greater uncertainty as to *in vivo*  
634 tissue concentrations but the *in vitro* effects of 100nm 1,25(OH)<sub>2</sub>D<sub>3</sub> on immunological  
635 markers mirror *ex vivo* correlates supporting this concentration being representative [19].

636 Although there are very few studies examining a beneficial role for vitamin D in  
637 alleviating adverse effects of pollution, there is a larger volume of evidence examining  
638 antioxidant supplementation as a strategy to reduce the harm to human health from air

639 pollution. For example multiple studies have investigated the capacity of antioxidant  
640 supplements (such as vitamin C and vitamin E) to abrogate any deleterious effect of air  
641 pollution on lung function and many of these have shown significant benefit [61]. Similarly  
642 there is suggestive evidence that supplementation of vitamin C and E may improve athletic  
643 performance in ozone-exposed runners [62], and that B vitamin supplementation can  
644 alleviate particulate exposure associated cardiac autonomic dysfunction [63], amongst other  
645 outcome measures studied. The major difference between vitamin D and other antioxidant  
646 vitamins (and minerals) is that the major natural source for vitamin D in humans is through  
647 sunlight exposure not diet. Vitamin D insufficiency / deficiency are extremely common in the  
648 developed world [64] and a healthy diet alone rarely contains adequate vitamin D to achieve  
649 sufficient status. Although ultraviolet (UV) light supplementation might be an option [65],  
650 population-level oral vitamin D supplementation may be necessary to alleviate the epidemic  
651 of vitamin D deficiency and reduce harm from air pollution.

652 Our study provides mechanistic evidence to support larger trials of vitamin D  
653 supplementation to alleviate the harmful impact of air pollution, similar to those conducted  
654 with other antioxidant vitamins. Our conclusions are based on samples from a limited  
655 number of subjects and next need to be followed up in larger translational studies. In the first  
656 instance exposure chamber studies in vitamin D deficient individuals randomised to vitamin  
657 D supplementation / placebo prior to exposure would provide the opportunity to confirm  
658 whether *in vivo* vitamin D supplementation beneficially impacts on the pulmonary response to  
659 ambient pollutants. Clinical endpoints and biomarkers could be studied in a larger sample of  
660 participants including healthy controls, a broader range of asthmatic patients and patients  
661 with other respiratory diseases.

662

663 This research focused on the effects of vitamin D on pollution-induced pro-  
664 inflammatory cytokine production by human bronchial epithelial cells, through the  
665 upregulation of antioxidant defences. Transcriptomics was used to identify cytokines of

666 interest, with the advantage of revealing differentially modulated cytokines in an unbiased  
667 manner. The array also identified multiple non-cytokine disease-associated genes regulated  
668 by PM-stimulation and vitamin D - such as *CLDN7*, *SERPINB1*, *COL1A1*, *SLPI* and *MMP9* -  
669 that were beyond the scope of this research. Many of these have been implicated in airways  
670 pathology and deserve future research.

671

## 672 **Conclusions**

673

674 In summary, vitamin D decreased oxidative stress and the particulate matter-induced IL-6  
675 response in HBEC cultures; with vitamin D pre-treatment suppressing the IL-6 response  
676 consistently in cultures from both healthy and asthmatic donors. Therefore vitamin D  
677 sufficiency is likely beneficial in protecting against pollution-induced inflammation in asthma,  
678 as well as in other pollution-associated diseases related to the induction of airway and  
679 systemic inflammation. Vitamin D supplementation has been shown to be safe and effective  
680 in preventing severe asthma exacerbations and acute respiratory tract infections when given  
681 to appropriate target groups [66] [67]. This research mechanistically supports a strategy of  
682 public health intervention to optimise the body's own defences against pollution (for example  
683 supplementation with vitamin D [12] or other vitamins [63]) to reduce the burden of pollution-  
684 associated disease.

685

## 686 **Acknowledgements**

687 The authors would like to acknowledge scientific advice pertaining to this research theme  
688 from Dr Nicholas Matthews and assistance in recruiting participants from Kheem Jones.

689

## 690 **References**

691

- 692 1. Eder W, Ege MJ, von Mutius E. The asthma epidemic. *N Engl J Med.* 2006;355:2226-  
693 2235.
- 694 2. Mann EH, Chambers ES, Pfeffer PE, Hawrylowicz CM. Immunoregulatory  
695 mechanisms of vitamin D relevant to respiratory health and asthma. *Ann N Y Acad*  
696 *Sci.* 2014;1317:57-69.
- 697 3. Pfeffer PE, Hawrylowicz CM. Vitamin D in Asthma: Mechanisms of Action and  
698 Considerations for Clinical Trials. *Chest.* 2018;153:1229-1239.
- 699 4. Miller RL, Peden DB. Environmental effects on immune responses in patients with  
700 atopy and asthma. *J Allergy Clin Immunol.* 2014;134:1001-1008.
- 701 5. Sun Q, Orellano P, Quaranta N, Reynoso J, Balbi B, Vasquez J. Effect of outdoor air  
702 pollution on asthma exacerbations in children and adults: Systematic review and  
703 multilevel meta-analysis. *Plos One.* 2017;12:e0174050.
- 704 6. Herr C, Greulich T, Kocuzulla RA, Meyer S, Zakharkina T, Branscheidt M, et al. The  
705 role of vitamin D in pulmonary disease: COPD, asthma, infection, and cancer. *Respir*  
706 *Res.* 2011;12:31.
- 707 7. Kelly FJ, Fussell JC. Air pollution and airway disease. *Clin Exp Allergy.*  
708 2011;41:1059-1071.
- 709 8. Gowers AM, Cullinan P, Ayres JG, Anderson HR, Strachan DP, Holgate ST, et al.  
710 Does outdoor air pollution induce new cases of asthma? Biological plausibility and  
711 evidence; a review. *Respirology.* 2012;17:887-898.

- 712 9. Atkinson RW, Anderson HR, Sunyer J, Ayres J, Baccini M, Vonk JM, et al. Acute  
713 effects of particulate air pollution on respiratory admissions: results from APHEA 2  
714 project. *Air Pollution and Health: a European Approach. Am J Respir Crit Care Med.*  
715 2001;164:1860-1866.
- 716 10. Moore E, Chatzidiakou L, Kuku MO, Jones RL, Smeeth L, Beevers S, et al. Global  
717 Associations between Air Pollutants and Chronic Obstructive Pulmonary Disease  
718 Hospitalizations. A Systematic Review. *Ann Am Thorac Soc.* 2016;13:1814-1827.
- 719 11. Jacquemin B, Siroux V, Sanchez M, Carsin AE, Schikowski T, Adam M, et al.  
720 Ambient air pollution and adult asthma incidence in six European cohorts (ESCAPE).  
721 *Environ Health Perspect.* 2015;123:613-621.
- 722 12. Rosser F, Brehm JM, Forno E, Acosta-Perez E, Kurland K, Canino G, et al. Proximity  
723 to a Major Road, Vitamin D Insufficiency, and Severe Asthma Exacerbations in  
724 Puerto Rican Children. *Am J Respir Crit Care Med.* 2014;190:1190-1192.
- 725 13. Holgate ST. The sentinel role of the airway epithelium in asthma pathogenesis.  
726 *Immunol Rev.* 2011;242:205-219.
- 727 14. Ghio AJ, Carraway MS, Madden MC. Composition of air pollution particles and  
728 oxidative stress in cells, tissues, and living systems. *J Toxicol Environ Health B Crit*  
729 *Rev.* 2012;15:1-21.
- 730 15. Teng Y, Sun P, Zhang J, Yu R, Bai J, Yao X, et al. Hydrogen peroxide in exhaled  
731 breath condensate in patients with asthma: a promising biomarker? *Chest.*  
732 2011;140:108-116.
- 733 16. Mak JC, Ho SP, Ho AS, Law BK, Cheung AH, Ho JC, et al. Sustained elevation of  
734 systemic oxidative stress and inflammation in exacerbation and remission of asthma.  
735 *ISRN Allergy.* 2013;2013:561831.
- 736 17. Zuo L, Otenbaker NP, Rose BA, Salisbury KS. Molecular mechanisms of reactive  
737 oxygen species-related pulmonary inflammation and asthma. *Mol Immunol.*  
738 2013;56:57-63.

- 739 18. Li N, Hao M, Phalen RF, Hinds WC, Nel AE. Particulate air pollutants and asthma - a  
740 paradigm for the role of oxidative stress in PM-induced adverse health effects. Clin  
741 Immunol. 2003;109:250-265.
- 742 19. Pfeffer PE, Mann EH, Hornsby E, Chambers ES, Chen YH, Rice LV, et al. Vitamin D  
743 influences asthmatic pathology through its action on diverse immunological pathways.  
744 Ann Am Thorac Soc. 2014;11:S314-321.
- 745 20. Chambers ES, Hawrylowicz CM. The impact of vitamin D on regulatory T cells. Curr  
746 Allergy Asthma Rep. 2011;11:29-36.
- 747 21. Hansdottir S, Monick MM, Lovan N, Powers L, Gerke A, Hunninghake GW. Vitamin D  
748 decreases respiratory syncytial virus induction of NF-kappaB-linked chemokines and  
749 cytokines in airway epithelium while maintaining the antiviral state. J Immunol.  
750 2010;184:965-974.
- 751 22. National Institute of Standards & Technology. Standard Reference Material 1648a.  
752 2015 [accessed 2016 Aug 19]. Available from: [https://www-s.  
753 nist.gov/srmors/certificates/1648A.pdf](https://www-s.nist.gov/srmors/certificates/1648A.pdf)
- 754 23. Kent KD, Bomser JA. Bovine Pituitary Extract provides remarkable protection against  
755 oxidative stress in human prostate epithelial cells. In Vitro Cell Dev Biol Anim.  
756 2003;39:388-394.
- 757 24. Itin P, Pittelkow MR, Kumar R. Effects of vitamin D metabolites on proliferation and  
758 differentiation of cultured human epidermal keratinocytes grown in serum-free or  
759 defined culture medium. Endocrinology. 1994;135:1793-1798.
- 760 25. Rohde CM, Manatt M, Clagett-Dame M, DeLuca HF. Vitamin A antagonizes the  
761 action of vitamin D in rats. J Nutr. 1999;129:2246-2250.
- 762 26. Pfaffl MW. A new mathematical model for relative quantification in real-time RT-PCR.  
763 Nucleic Acids Res. 2001;29:e45.
- 764 27. Pfeffer PE, Chen YH, Woszczek G, Matthews NC, Chevretton E, Gupta A, et al.  
765 Vitamin D enhances production of soluble ST2, inhibiting the action of IL-33. J Allergy  
766 Clin Immunol. 2015;135:824-827.

- 767 28. Stanton RC. Glucose-6-phosphate dehydrogenase, NADPH, and cell survival. *IUBMB*  
768 *Life*. 2012;64:362-369.
- 769 29. Adar SD, Huffnagle GB, Curtis JL. The respiratory microbiome: an underappreciated  
770 player in the human response to inhaled pollutants? *Ann Epidemiol*. 2016;26:355-  
771 359.
- 772 30. Vrijheid M. The exposome: a new paradigm to study the impact of environment on  
773 health. *Thorax*. 2014;69:876-878.
- 774 31. Neveu WA, Allard JL, Raymond DM, Bourassa LM, Burns SM, Bunn JY, et al.  
775 Elevation of IL-6 in the allergic asthmatic airway is independent of inflammation but  
776 associates with loss of central airway function. *Respir Res*. 2010;11:28.
- 777 32. Shute JK, Vrugt B, Lindley IJD, Holgate ST, Bron AAD, Aalbers R, et al. Free and  
778 complexed Interleukin-8 in blood and bronchial mucosa in asthma. *Am J Respir Crit*  
779 *Care Med*. 1997;155:1877-1883.
- 780 33. Kim CK, Choi J, Callaway Z, Iijima K, Volcheck G, Kita H. Increases in airway  
781 eosinophilia and a Th1 cytokine during the chronic asymptomatic phase of asthma.  
782 *Respir Med*. 2010;104:1436-1443.
- 783 34. Hosoki K, Ying S, Corrigan C, Qi H, Kurosky A, Jennings K, et al. Analysis of a Panel  
784 of 48 Cytokines in BAL Fluids Specifically Identifies IL-8 Levels as the Only Cytokine  
785 that Distinguishes Controlled Asthma from Uncontrolled Asthma, and Correlates  
786 Inversely with FEV1. *PLoS One*. 2015;10:e0126035.
- 787 35. Kido T, Tamagawa E, Bai N, Suda K, Yang HH, Li Y, et al. Particulate matter induces  
788 translocation of IL-6 from the lung to the systemic circulation. *Am J Respir Cell Mol*  
789 *Biol*. 2011;44:197-204.
- 790 36. Mutlu GM, Green D, Bellmeyer A, Baker CM, Burgess Z, Rajamannan N, et al.  
791 Ambient particulate matter accelerates coagulation via an IL-6-dependent pathway. *J*  
792 *Clin Invest*. 2007;117:2952-2961.
- 793 37. Pasare C, Medzhitov R. Toll Pathway–Dependent Blockade of CD4+CD25+ T Cell–  
794 Mediated Suppression by Dendritic Cells. *Science*. 2003;299:1033-1036.

- 795 38. Erger RA, Casale TB. Interleukin-8 is a potent mediator of eosinophil chemotaxis  
796 through endothelium and epithelium. *Am J Physiol.* 1995;268:L117-122.
- 797 39. Bleck B, Tse DB, Jaspers I, Curotto de Lafaille MA, Reibman J. Diesel exhaust  
798 particle-exposed human bronchial epithelial cells induce dendritic cell maturation. *J*  
799 *Immunol.* 2006;176:7431-7437.
- 800 40. Soloperto M, Mattoso VL, Fasoli A, Mattoli S. A bronchial epithelial cell-derived factor  
801 in asthma that promotes eosinophil activation and survival as GM-CSF. *Am J Physiol*  
802 *Lung Cell Mol Physiol.* 1991;260:L530-538.
- 803 41. Paine R, Wilcoxon SE, Morris SB, Sartori C, Baleeiro CEO, Matthay MA, et al.  
804 Transgenic Overexpression of Granulocyte Macrophage-Colony Stimulating Factor in  
805 the Lung Prevents Hyperoxic Lung Injury. *Am J Pathol.* 2003;163:2397-2406.
- 806 42. Sturrock A, Seedahmed E, Mir-Kasimov M, Boltax J, McManus ML, Paine R 3rd. GM-  
807 CSF provides autocrine protection for murine alveolar epithelial cells from oxidant-  
808 induced mitochondrial injury. *Am J Physiol Lung Cell Mol Physiol.* 2012;302:L343-  
809 351.
- 810 43. Peters MC, McGrath KW, Hawkins GA, Hastie AT, Levy BD, Israel E, et al. Plasma  
811 interleukin-6 concentrations, metabolic dysfunction, and asthma severity: a cross-  
812 sectional analysis of two cohorts. *Lancet Respir Med.* 2016;4:574-584.
- 813 44. Ferreira MAR, Matheson MC, Duffy DL, Marks GB, Hui J, Le Souëf P, et al.  
814 Identification of IL6R and chromosome 11q13.5 as risk loci for asthma. *Lancet.*  
815 2011;378:1006-1014.
- 816 45. Behndig AF, Larsson N, Brown JL, Stenfors N, Helleday R, Duggan ST, et al.  
817 Proinflammatory doses of diesel exhaust in healthy subjects fail to elicit equivalent or  
818 augmented airway inflammation in subjects with asthma. *Thorax.* 2011;66:12-19.
- 819 46. Lotz M, Jirik F, Kabouridis P, Tsoukas C, Hirano T, Kishimoto T, et al. B Cell  
820 Stimulating Factor 2/Interleukin 6 is a costimulant for human thymocytes and T  
821 lymphocytes. *J Exp Med.* 1988;167:1253-1258.



- 822 47. Bettelli E, Carrier Y, Gao W, Korn T, Strom TB, Oukka M, et al. Reciprocal  
823 developmental pathways for the generation of pathogenic effector TH17 and  
824 regulatory T cells. *Nature*. 2006;441:235-238.
- 825 48. Yang X, Jiang Y, Wang C. Does IL-17 Respond to the Disordered Lung Microbiome  
826 and Contribute to the Neutrophilic Phenotype in Asthma? *Mediators Inflamm*.  
827 2016;2016:6470364.
- 828 49. Brandt EB, Kovacic MB, Lee GB, Gibson AM, Acciani TH, Le Cras TD, et al. Diesel  
829 exhaust particle induction of IL-17A contributes to severe asthma. *J Allergy Clin  
830 Immunol*. 2013;132:1194-1204.
- 831 50. Matthews NC, Pfeffer PE, Mann EH, Kelly FJ, Corrigan CJ, Hawrylowicz CM, et al.  
832 Urban Particulate Matter-activated Human Dendritic Cells Induce the Expansion of  
833 Potent Inflammatory Th1, Th2 and Th17 Effector Cells. *Am J Respir Cell Mol Biol*.  
834 2016;54:250-262.
- 835 51. Bao BY, Ting HJ, Hsu JW, Lee YF. Protective role of 1 alpha, 25-dihydroxyvitamin D3  
836 against oxidative stress in nonmalignant human prostate epithelial cells. *Int J Cancer*.  
837 2008;122:2699-2706.
- 838 52. Peng X, Vaishnav A, Murillo G, Alimirah F, Torres KE, Mehta RG. Protection against  
839 cellular stress by 25-hydroxyvitamin D3 in breast epithelial cells. *J Cell Biochem*  
840 2010;110:1324-1333.
- 841 53. Sun J, Zhong W, Gu Y, Groome LJ, Wang Y. 1,25(OH)2D3 suppresses COX-2 up-  
842 regulation and thromboxane production in placental trophoblast cells in response to  
843 hypoxic stimulation. *Placenta*. 2014;35:143-145.
- 844 54. Hansdottir S, Monick MM, Hinde SL, Lovan N, Look DC, Hunninghake GW.  
845 Respiratory epithelial cells convert inactive vitamin D to its active form: Potential  
846 effects on host defence. *J Immunol*. 2008;181:7090-7099.
- 847 55. Lan N, Luo G, Yang X, Cheng Y, Zhang Y, Wang X, et al. 25-hydroxyvitamin D3-  
848 deficiency enhances oxidative stress and corticosteroid resistance in severe asthma  
849 exacerbation. *PLoS One*. 2014;9:e111599.

- 850 56. Sienna-Monge JJ, Ramirez-Aguilar M, Moreno-Macias H, Reyes-Ruiz NI, Del Rio-  
851 Navarro BE, Ruiz-Navarro MX, et al. Antioxidant supplementation and nasal  
852 inflammatory responses among young asthmatics exposed to high levels of ozone.  
853 Clin Exp Immunol. 2004;138:317-322.
- 854 57. Barnes PJ. Corticosteroid resistance in patients with asthma and chronic obstructive  
855 pulmonary disease. J Allergy Clin Immunol. 2013;131:636-645.
- 856 58. Chambers ES, Nanzer AM, Pfeffer PE, Richards DF, Timms PM, Martineau AR, et al.  
857 Distinct endotypes of steroid-resistant asthma characterized by IL-17A and IFN-  
858 gamma immunophenotypes: Potential benefits of calcitriol. J Allergy Clin Immunol.  
859 2015;136:628-637
- 860 59. Zhang Y, Leung DY, Richers BN, Liu Y, Remigio LK, Riches DW, et al. Vitamin D  
861 inhibits monocyte/macrophage proinflammatory cytokine production by targeting  
862 MAPK phosphatase-1. J Immunol. 2012;188:2127-2135.
- 863 60. Codoner-Franch P, Tavares-Alonso S, Simo-Jorda R, Laporta-Martin P, Carratala-  
864 Calvo A, Alonso-Iglesias E. Vitamin D status is linked to biomarkers of oxidative  
865 stress, inflammation, and endothelial activation in obese children. J Pediatr.  
866 2012;161:848-854.
- 867 61. Tashakkor AY, Chow KS, Carlsten C. Modification by antioxidant supplementation of  
868 changes in human lung function associated with air pollutant exposure: a systematic  
869 review. BMC Public Health. 2011;11:532.
- 870 62. Gomes EC, Allgrove JE, Florida-James G, Stone V. Effect of vitamin supplementation  
871 on lung injury and running performance in a hot, humid, and ozone-polluted  
872 environment. Scand J Med Sci Sports. 2011;21:e452-460.
- 873 63. Zhong J, Trevisi L, Urch B, Lin X, Speck M, Coull BA, et al. B-vitamin  
874 Supplementation Mitigates Effects of Fine Particles on Cardiac Autonomic  
875 Dysfunction and Inflammation: A Pilot Human Intervention Trial. Sci Rep.  
876 2017;7:45322.

- 877 64. Hypponen E, Power C. Hypovitaminosis D in British adults at age 45 y: nationwide  
878 cohort study of dietary and lifestyle predictors. *Am J Clin Nutr.* 2007;85:860-868.
- 879 65. Morgan KA, Mann EH, Young AR, Hawrylowicz CM. ASTHMA - comparing the  
880 impact of vitamin D versus UVR on clinical and immune parameters. *Photochem*  
881 *Photobiol. Sci* 2017;16:399-410.
- 882 66. Martineau AR, Cates CJ, Urashima M, Jensen M, Griffiths AP, Nurmatov U, et al.  
883 Vitamin D for the management of asthma. *Cochrane Database Syst Rev.*  
884 2016;9:CD011511.
- 885 67. Martineau AR, Jolliffe DA, Hooper RL, Greenberg L, Aloia JF, Bergman P, et al.  
886 Vitamin D supplementation to prevent acute respiratory tract infections: systematic  
887 review and meta-analysis of individual participant data. *BMJ.* 2017;356:i6583.

888

## 889 **Supporting Information Captions**

890

891 **S1 Table. Taqman primer probesets.**

892

893 **S2 Table. Genes showing differential regulation by both NIST stimulation and vitamin**  
894 **D in the transcription microarray.**

895 Gene expression fold-changes in a transcription microarray of HBECs cultured for 24 hours  
896 with/without 50µg/ml NIST stimulation in the presence/absence of 100nM 1,25(OH)<sub>2</sub>D<sub>3</sub>.  
897 Short-list of genes showing both differential expression with NIST stimulation (fold change ≥  
898 ± 1.4) and differential expression with vitamin D treatment in presence of NIST stimulation  
899 (fold change ≥ ± 1.4).

900

901 **S1 Fig: Cytokine production by HBEC cultures from healthy and asthmatic donors**  
902 **stimulated by NIST PM with / without 1,25(OH)<sub>2</sub>D<sub>3</sub>.**

903 Primary HBECs stimulated for 24 hours with 50µg/ml NIST in the presence/absence of  
904 100nM 1,25(OH)<sub>2</sub>D<sub>3</sub>. VC; vehicle control for NIST. Healthy donor cultures: n=8 for IL-6, n=9  
905 for CXCL8, n=8 for GM-CSF. Asthmatic donor cultures: n=7 for IL-6, n=8 for CXCL8, n=6 for  
906 GM-CSF. Friedman's tests with Dunn's multiple-comparisons tests. Statistical significance: \*,  
907  $p \leq 0.05$ .

908

909 **S2 Fig: Induction of cytokine gene expression in HBEC cultures from healthy and**  
910 **asthmatic donors stimulated by NIST PM with / without 1,25(OH)<sub>2</sub>D<sub>3</sub>.**

911 (A) Induction of *IL6* and *CSF2* by 50µg/ml NIST PM stimulation in the presence / absence  
912 of 100nM 1,25(OH)<sub>2</sub>D<sub>3</sub> in 4 hour and 24 hour cultures of HBECs from healthy and asthmatic  
913 donors. H, Healthy donor HBECs; A, Asthmatic donor HBEC cultures. Tie-bars show paired  
914 results from the same donor cultures. 4hr healthy, n=5; 4hr asthmatic, n=5; 24hr healthy,  
915 n=6-7; 24hr asthmatic, n=6.

916 (C) Induction of *IL6* and *CSF2* by NIST at 4 hours compared to suppression by 100nM  
917 1,25(OH)<sub>2</sub>D<sub>3</sub> at 24 hours of IL-6 and GM-CSF production respectively in NIST PM stimulated  
918 HBEC cultures. n=8 (4 healthy and 4 asthmatic).

919

920 **S3 Fig: Effect of NIST stimulation on expression of the vitamin D axis genes *CYP27B1***  
921 **and *VDR*, and comparison of response to 25(OH)D<sub>3</sub> and 1,25(OH)<sub>2</sub>D<sub>3</sub>.**

922 (A) Expression of *CYP27B1* mRNA in 24 hour HBEC cultures stimulated with 50µg/ml  
923 NIST PM with/without 100nM 1,25(OH)<sub>2</sub>D<sub>3</sub> (n=9), or with 1µg/ml Poly(I:C) (paired t-test,  
924 n=6). Gene expression measured by qPCR relative to the house-keeping gene *18S*, and  
925 shown relative to the control condition. Statistical significance as follows: \*,  $p \leq 0.05$ ; \*\*,  $p \leq$   
926  $0.01$ ; \*\*\*,  $p \leq 0.001$ .

927 (B) Expression of *VDR* in 24 hour cultures stimulated with PM with/without 1,25(OH)<sub>2</sub>D<sub>3</sub>  
928 (n=7), or with 1µg/ml Poly(I:C) (paired t-test, n=4).

929 (C) Percentage suppression of cytokine-production in 24 hour cultures of PM-stimulated  
930 HBECs upon concurrent addition of 1,25(OH)<sub>2</sub>D<sub>3</sub> or 25(OH)D<sub>3</sub>. Cultures from healthy donors

931 shown as open circles and those from asthmatic donors as filled squares. IL-6, n=7 healthy,  
932 6 asthmatic; CXCL8, n=8 healthy, 7 asthmatic; GM-CSF, n=6-7 healthy, 6 asthmatic.

933

934 **S1 Data Appendix. Transcription microarray results after quantile normalisation and**

935 **ANOVA analysis (full gene list).**

**A**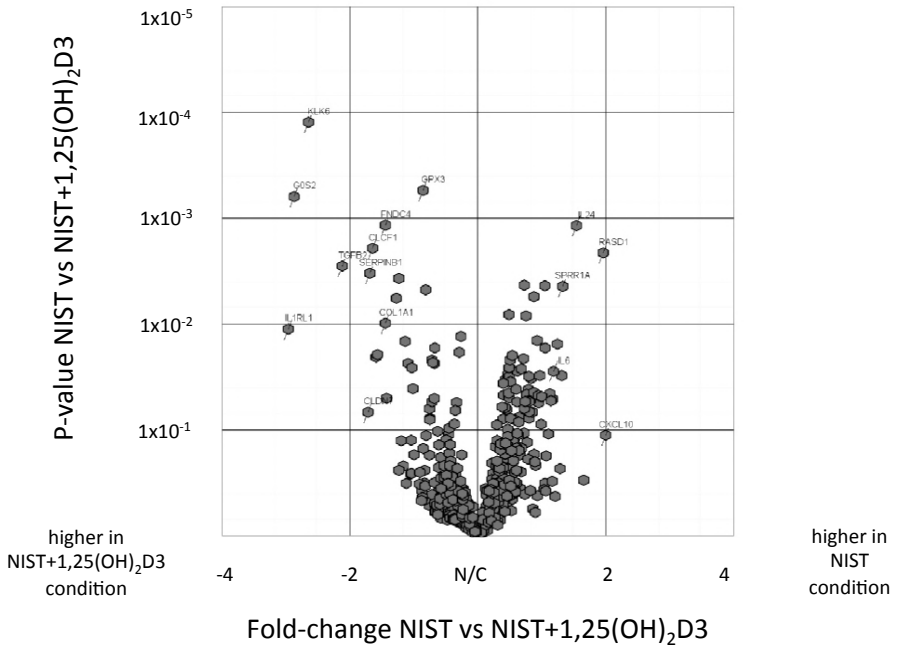**B**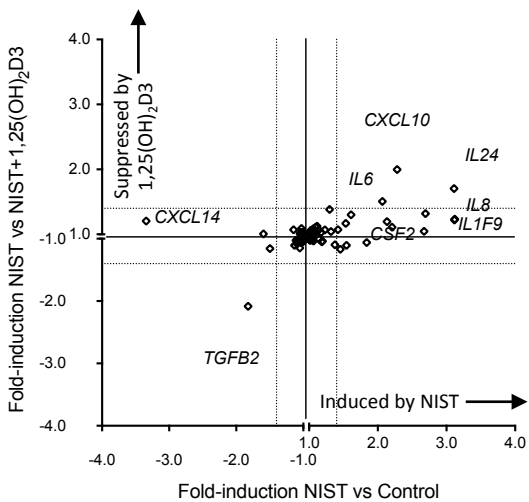

# A 4hr

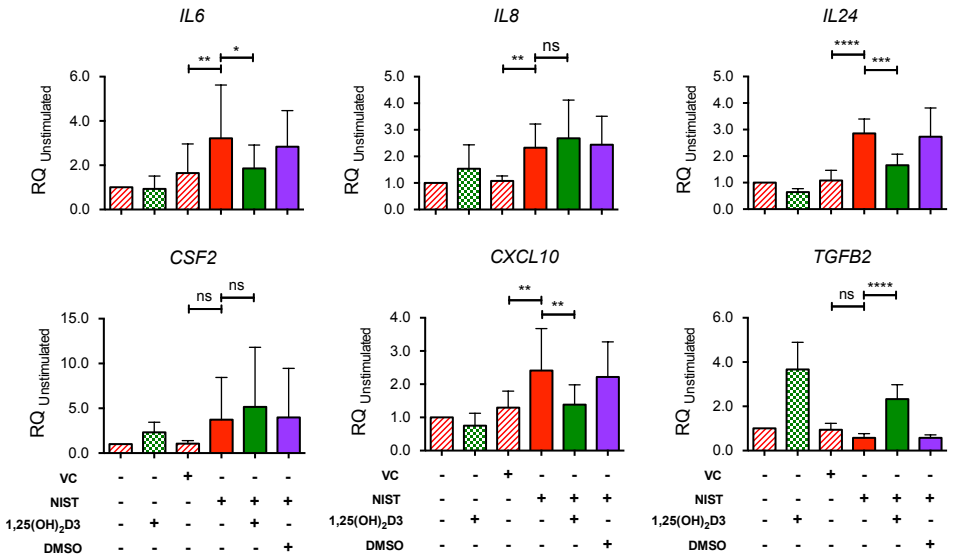

# B 24hr

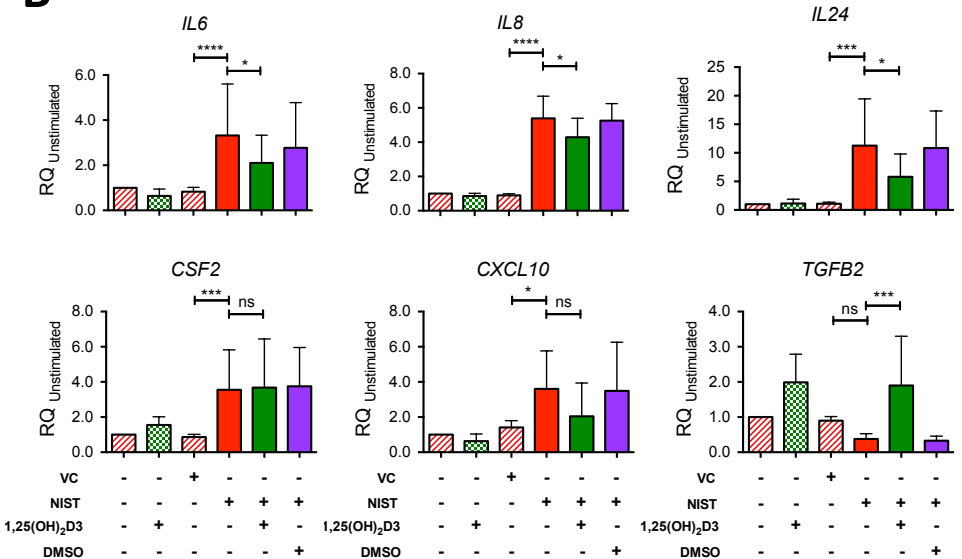

**A**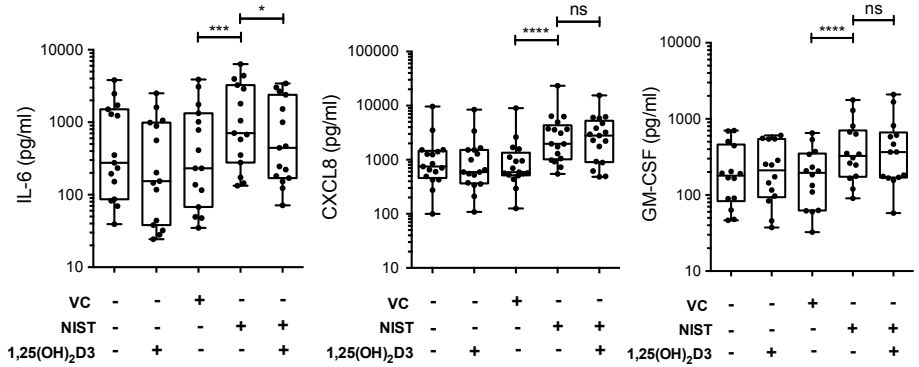**B**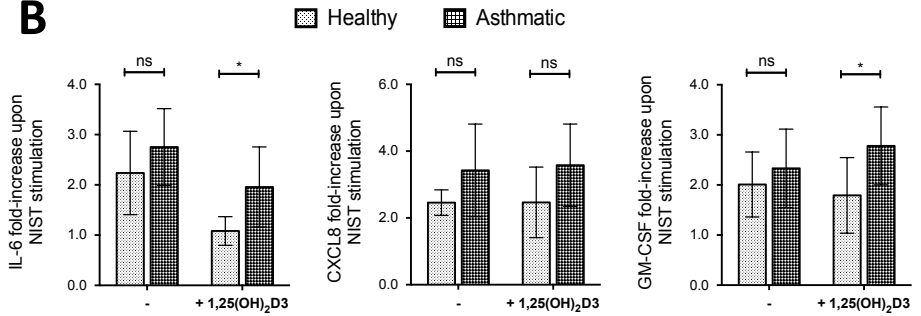**C**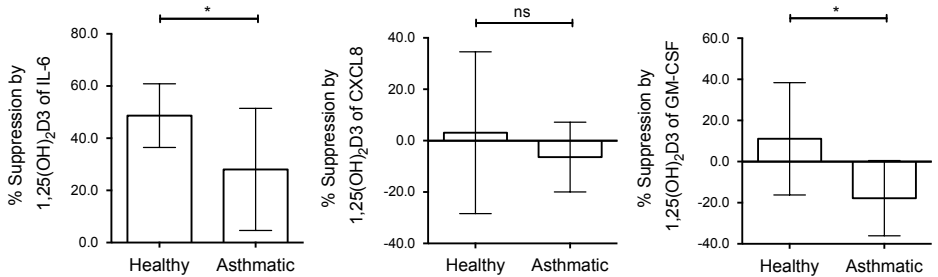



**A**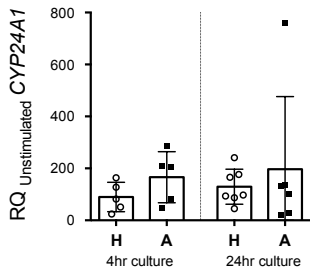**B**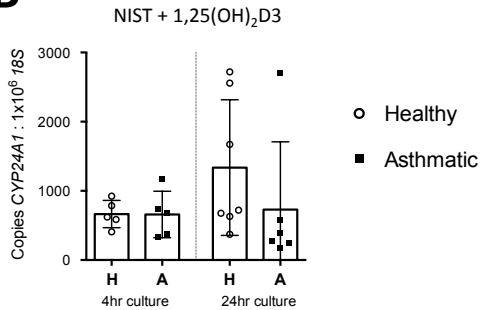**C**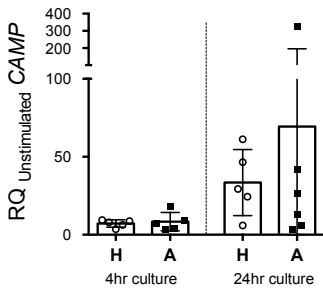**D**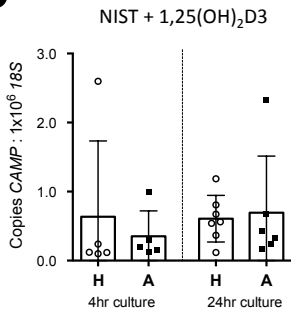

**A**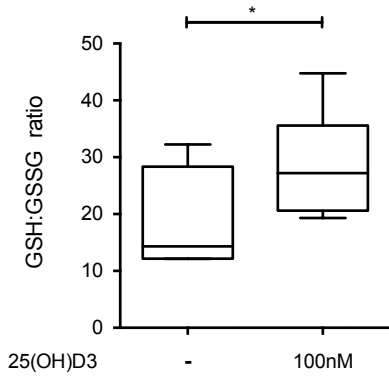**B**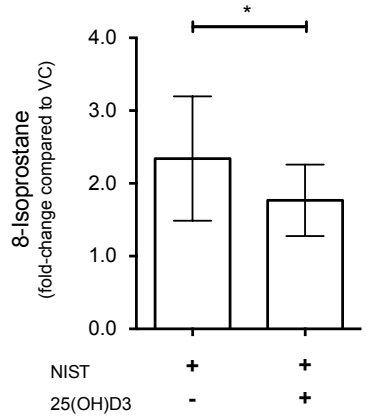

# A

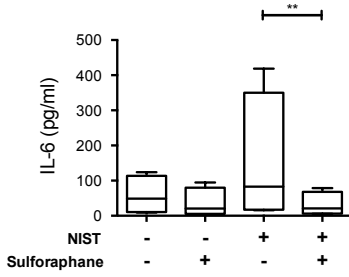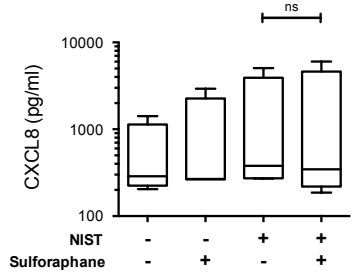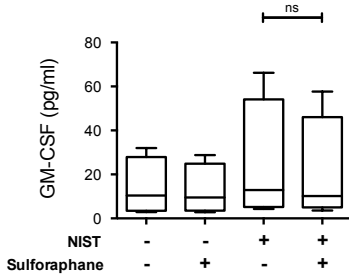

**A**4hr *G6PD*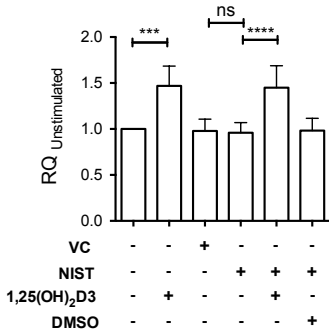**B**24hr *G6PD*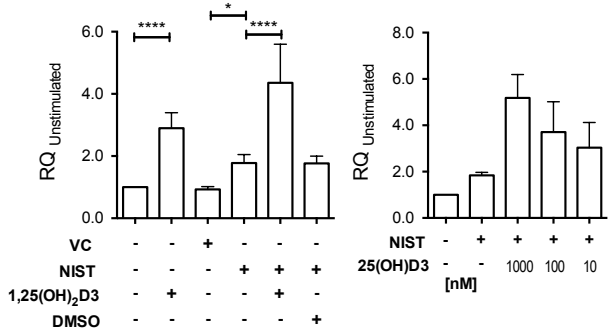**C**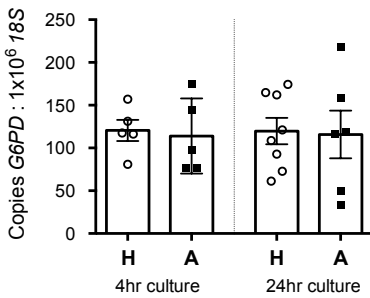**D**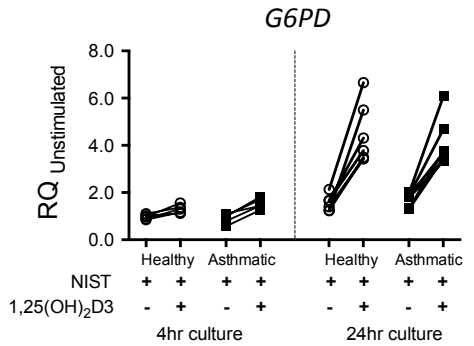

**A**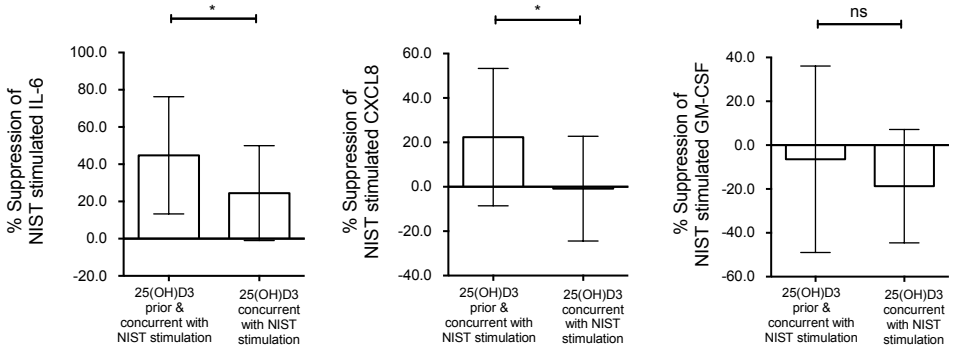**B**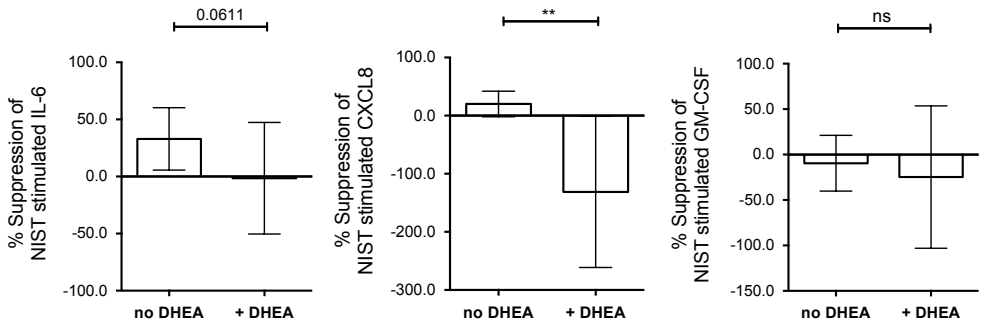

Source: https://www.biorxiv.org/content/biorxiv/early/2018/06/20/351791.full.pdf
